# Supplementary material for: Metabolomic Profiling of Adults with Congenital Heart Disease
Source: MDPI journal article supplement (doi:10.3390/metabo11080525), 2021-08-09
Supplement: s1 [file s1]

**Table S1.** Final multivariable regression models assessing the association between principal components loads, individual metabolites and adverse cardiac characteristics and outcomes.

| <b>O<sub>2</sub> saturation &lt; 95%</b> |            |           |            |            |                |
|------------------------------------------|------------|-----------|------------|------------|----------------|
| <i>Variable</i>                          | <i>Rel</i> | <i>OR</i> | <i>LCL</i> | <i>UCL</i> | <i>p-value</i> |
| Single ventricle                         | .          | 16.36     | 4.40       | 60.75      | <0.001         |
| GCDCA                                    | 98.4%      | 1.33      | 0.99       | 1.79       | 0.06           |
| Serotonin/tryptophan                     | 64.4%      | 0.86      | 0.78       | 0.94       | 0.002          |
| ADMA/Arg                                 | 95.8%      | 1.32      | 1.03       | 1.68       | 0.03           |
| Betaine                                  | 61.8%      | 1.06      | 1.01       | 1.11       | 0.02           |
| <b>Cardiac Dysfunction</b>               |            |           |            |            |                |
| <i>Variable</i>                          | <i>Rel</i> | <i>OR</i> | <i>LCL</i> | <i>UCL</i> | <i>p-value</i> |
| PC2                                      | 77.4%      | 0.89      | 0.82       | 0.97       | 0.01           |
| PC5                                      | 61.4%      | 1.15      | 1.02       | 1.29       | 0.02           |
| Citrulline                               | 89.2%      | 1.09      | 1.02       | 1.16       | 0.02           |
| Cystine                                  | 65.6%      | 1.01      | 1.00       | 1.03       | 0.04           |
| 1-Methylhistidine                        | 60.2%      | 1.15      | 1.02       | 1.29       | 0.02           |
| <b>RV Dysfunction</b>                    |            |           |            |            |                |
| <i>Variable</i>                          | <i>Rel</i> | <i>OR</i> | <i>LCL</i> | <i>UCL</i> | <i>p-value</i> |
| TGA                                      | .          | 9.65      | 2.40       | 38.8       | 0.001          |
| PC4                                      | 94.0%      | 0.85      | 0.76       | 0.96       | 0.01           |
| DHEAS                                    | 59.0%      | 0.64      | 0.41       | 1.00       | 0.05           |
| <b>Arrhythmia History</b>                |            |           |            |            |                |
| <i>Variable</i>                          | <i>Rel</i> | <i>OR</i> | <i>LCL</i> | <i>UCL</i> | <i>p-value</i> |
| TGA                                      | .          | 5.96      | 1.54       | 23.1       | 0.01           |
| Single ventricle                         | .          | 39.6      | 3.38       | 463        | 0.003          |
| Age at assessment                        | .          | 1.06      | 1.01       | 1.10       | 0.01           |
| PC2                                      | 97.2%      | 1.09      | 1.02       | 1.16       | 0.01           |
| TMCA                                     | 100.0%     | 1.46      | 1.00       | 2.13       | 0.05           |
| Orn/Arg                                  | 100.0%     | 1.22      | 1.05       | 1.43       | 0.01           |
| <b>Arrhythmia History</b>                |            |           |            |            |                |
| <i>Variable</i>                          | <i>Rel</i> | <i>OR</i> | <i>LCL</i> | <i>UCL</i> | <i>p-value</i> |
| TGA                                      | .          | 6.23      | 1.89       | 20.6       | 0.003          |
| Single ventricle                         | .          | 20.1      | 1.61       | 251        | 0.02           |
| Age at assessment                        | .          | 1.04      | 1.00       | 1.08       | 0.08           |
| PC2                                      | 98.0%      | 1.08      | 1.01       | 1.15       | 0.02           |
| TCA                                      | 99.8%      | 1.28      | 1.02       | 1.60       | 0.03           |
| Orn/Arg                                  | 95.0%      | 1.19      | 1.01       | 1.41       | 0.03           |
| <b>Shortness of Breath</b>               |            |           |            |            |                |
| <i>Variable</i>                          | <i>Rel</i> | <i>OR</i> | <i>LCL</i> | <i>UCL</i> | <i>p-value</i> |
| Ornithine                                | 98.8%      | 1.05      | 1.02       | 1.08       | <0.001         |
| Homo-L-Arginine                          | 95.8%      | 0.07      | 0.02       | 0.30       | <0.001         |
| SDMA/Arg                                 | 80.4%      | 1.15      | 1.03       | 1.29       | 0.01           |
| <b>Exertional SOB</b>                    |            |           |            |            |                |
| <i>Variable</i>                          | <i>Rel</i> | <i>OR</i> | <i>LCL</i> | <i>UCL</i> | <i>p-value</i> |
| Hypertension                             | .          | 2.64      | 1.15       | 6.05       | 0.02           |
| PC1                                      | 89.6%      | 0.96      | 0.93       | 0.98       | 0.003          |
| PC4                                      | 94.8%      | 0.90      | 0.82       | 0.98       | 0.02           |

Abbreviations: ADMA—asymmetric dimethylarginine; Arg—arginine; DHEAS—dehydroepiandrosterone sulfate; GCA—glycolic acid; LCL—lower confidence limit; mets—metabolites; O<sub>2</sub>—oxygen; OR—odds ratio; Orn—ornithine; PC—principal component; Rel—reliability in bootstrap resampling analysis; RV—right ventricular; SDMA—symmetric

dimethylarginine; SOB—shortness of breath; TGA—transposition of the great arteries; TMCA—taumuricholic acid; UCL—upper confidence limit.

**Table S2.** Patient clinical status at the time of sample collection (number of patients = 99; number of assessments = 167) \*.

|                            | N  | Septal Defects | N  | Single Ventricle | N  | TGA      | N  | TOF/RVOT | N  | Other    |
|----------------------------|----|----------------|----|------------------|----|----------|----|----------|----|----------|
| Age (years)                | 33 | 43 ± 15        | 16 | 33 ± 8           | 45 | 37 ± 13  | 54 | 38 ± 14  | 19 | 33 ± 10  |
| Systolic pressure (mmHg)   | 33 | 114 ± 17       | 16 | 117 ± 10         | 44 | 115 ± 18 | 54 | 127 ± 17 | 19 | 123 ± 19 |
| Heart rate (bpm)           | 33 | 74 ± 14        | 16 | 76 ± 11          | 43 | 72 ± 11  | 54 | 76 ± 14  | 19 | 77 ± 13  |
| O2 saturation < 95%        | 33 | 5 (15%)        | 16 | 12 (75%)         | 44 | 2 (5%)   | 54 | 2 (4%)   | 19 | 2 (11%)  |
| Current arrhythmia         | 33 | 7 (21%)        | 16 | 13 (81%)         | 45 | 30 (67%) | 54 | 7 (13%)  | 19 | 2 (11%)  |
| Any cardiac dysfunction    | 15 | 7 (47%)        | 8  | 2 (25%)          | 19 | 12 (63%) | 36 | 18 (50%) | 12 | 0 (0%)   |
| Any RV dysfunction         | 15 | 4 (27%)        | 6  | 2 (33%)          | 19 | 11 (58%) | 35 | 16 (46%) | 12 | 0 (0%)   |
| RV volume overload         | 15 | 0 (0%)         | 5  | 0 (0%)           | 19 | 0 (0%)   | 35 | 13 (37%) | 11 | 0 (0%)   |
| Any LV dysfunction         | 15 | 6 (40%)        | 8  | 0 (0%)           | 18 | 2 (11%)  | 36 | 3 (8%)   | 12 | 0 (0%)   |
| Shortness of breath        | 31 | 3 (10%)        | 16 | 5 (31%)          | 43 | 9 (21%)  | 51 | 10 (20%) | 18 | 4 (22%)  |
| Exertional SOB             | 32 | 10 (31%)       | 16 | 8 (50%)          | 43 | 20 (47%) | 52 | 14 (27%) | 18 | 3 (17%)  |
| Anxiety/depression score   | 32 | 88 ± 13        | 16 | 71 ± 18          | 44 | 69 ± 24  | 53 | 83 ± 17  | 18 | 82 ± 16  |
| Arrhythmia score           | 31 | 83 ± 17        | 16 | 68 ± 34          | 44 | 76 ± 26  | 52 | 82 ± 17  | 18 | 73 ± 20  |
| Physical limitations score | 32 | 64 ± 22        | 16 | 52 ± 25          | 44 | 57 ± 30  | 52 | 67 ± 24  | 18 | 68 ± 24  |
| Quality of life score      | 32 | 76 ± 20        | 16 | 56 ± 20          | 44 | 63 ± 27  | 53 | 71 ± 23  | 18 | 74 ± 18  |
| Symptoms score             | 32 | 80 ± 17        | 16 | 62 ± 26          | 44 | 69 ± 22  | 53 | 77 ± 18  | 18 | 74 ± 22  |
| Total score                | 32 | 80 ± 15        | 16 | 63 ± 20          | 44 | 66 ± 23  | 53 | 77 ± 17  | 18 | 76 ± 17  |
| Worsening quality of life  | 23 | 2 (9%)         | 14 | 1 (7%)           | 36 | 11 (31%) | 39 | 4 (10%)  | 12 | 1 (8%)   |

N = Number of Assessments; RV volume overload—moderate or greater mitral or pulmonary regurgitation. Abbreviations: O2—oxygen; LV—left ventricular; RV—right ventricular. \*Certain patients had more than one assessment during the study period.

**Table S3.** Non-cardiac diagnoses. Each space includes all non-cardiac diagnoses for each of the 71 patients in whom a non-cardiac diagnosis was present.

| Types of Non-Cardiac Diagnoses                                                                                         |
|------------------------------------------------------------------------------------------------------------------------|
| Patellar instability; Hypothyroid; Zoster; Hypercholesterolemia                                                        |
| Asthma                                                                                                                 |
| Obesity; Stenosis of R subclavian                                                                                      |
| Exercise induced asthma                                                                                                |
| Focal segmental glomerulosclerosis; Joint hypermobility; Recurrent pneumonias; Guillain barre history; Scoliosis       |
| Hx of pancreatitis; Deep vein thrombosis; Seizure disorder; Stroke; Restrictive ventilatory defect; Hypothyroidism;    |
| Ashtma; Depression                                                                                                     |
| Leukemia; Obstructive sleep apnea; Obesity; Down's Syndrome                                                            |
| Radial-ulnar synostoses                                                                                                |
| Anxiety; Attention deficit disorder; Large facial teratoma; Dysarthria likely due to deficient palate; Disequilibrium; |
| Developmental delay; Menorrhagia                                                                                       |
| Psoriasis; Psoriatic arthritis; Essential thrombocytosis; Asthma; Obstructive sleep apnea; Obesity                     |
| Hypercholesterolemia                                                                                                   |
| Pulmonary hypertension                                                                                                 |
| Hypertension; Vascular disease involving the celiac axis and carotid arteries; Pulmonary hypertension                  |
| Asthma; Migraine; Fibromyalgia; Irritable Bowel Syndrome; Hepatitis C; Hypothyroidism                                  |
| 22q11 deletion syndrome; Acne vulgaris; Gingival hyperplasia                                                           |
| Hypertriglyceridemia; Allergic rhinitis                                                                                |
| Cataracts; Depression; Cardiac cirrhosis; Obstructive sleep apnea                                                      |
| Raynauds; Seasonal allergies; Back pain                                                                                |
| Paralyzed vocal cord; Alcoholism; Anxiety/depression; Obstructive sleep apnea; Chronically decreased vision in the     |
| left eye; Status post surgery to remove a supernumerary digit from his left thumb in infancy                           |
| Allergic rhinitis; Diverticulosis coli; Anxiety; Panic disorder; Pulmonary hypertension; Obesity; Snoring without      |
| sleep apnea; Non-alcoholic steatohepatitis; Thyroid nodules; Osteoarthritis                                            |

Obesity; Post traumatic stress disorder; Anxiety  
 Chronic sinusitis; Obesity; Hypothyroidism  
 Headaches; Endometriosis  
 Hyperlipidemia; Acne; Depression/anxiety; MTHFR gene mutation; Anemia; Lipomas  
 Carpal tunnel syndrome on left; Hepatitis C; Lymphadenopathy  
 Cohen's syndrome; Hypothyroidism; Seizures; Obesity  
 Pectus excavatum; Scoliosis; Obesity; Synostosis (cranial); Amenorrhea  
 Chronic osteoarthritis  
 Anemia; Depression; Gastroesophageal reflux disease; Hiatal hernia; History of kidney stones; Hyperlipidemia;  
 Obesity; Obstructive sleep apnea  
 Obesity; Hyperlipidemia  
 Mild persistent asthma  
 Plantar fascial fibromatosis; Osteoporosis  
 Hyperlipidemia  
 Gastroesophageal reflux disease; Gout; Iron deficiency; Obstructive sleep apnea; Pulmonary embolism; Transient  
 ischemic attack  
 Rheumatoid arthritis  
 Gastroesophageal reflux disease; Psychotic affective disorder; Developmental delay; Sleep apnea; Hyperlipidemia;  
 Obesity  
 Attention-deficit disorder; Down's syndrome; Hypothyroidism; Obesity; Obstructive sleep apnea; Pulmonary  
 hypertension; Refractive amblyopia; Thyrotoxicosis history  
 Depression; Pulmonary hypertension  
 Nephrolithiasis  
 Hyperlipidemia; Thyroid disease; Migraine aura without headache  
 Obesity; Depression  
 Tracheal stenosis  
 Attention deficit disorder; Acne vulgaris  
 Obstructive sleep apnea  
 Sjogren's syndrome; Parenchymal lung disease; Migraine headache; Iron deficiency anemia; Gastroesophageal reflux  
 disease; Mixed connective tissue disease; Pectus excavatum; Scoliosis  
 Fracture of shaft of clavicle  
 Anxiety; Asthma; Down's syndrome; Eczema; Hypothyroidism; Obstructive sleep apnea  
 C7 spinal cord injury; Calculus of kidney; Chronic cystitis; Edema; Endometriosis; Hyperlipidemia; Osteoporosis;  
 Pressure ulcer; Restrictive lung disease; Pressure sore on head  
 Congenital coxa vara; Pectus excavatum; Anxiety disorder; Dorsalgia  
 Hearing impairment; Cyanosis; Mental disability;  
 Interstitial lung disease; Pulmonary hypertension; Obstructive sleep apnea; Pulmonary tuberculosis; Hyperlipidemia  
 Obstructive sleep apnea; Epilepsy; Gastroesophageal reflux disease; Anoxic brain injury; Dysphagia; Psoriasis;  
 Pulmonary hypertension; Seizures  
 Malignant neoplasm of prostate  
 Hyperlipidemia  
 Benign prostatic hyperplasia; Gastroesophageal reflux disease; Hernia; Hyperlipidemia; Hypertension; Nonalcoholic  
 steatohepatitis; Chronic obstructive lung disease  
 Pulmonary hypertension  
 Anemia; Asthma; Congenital malrotation of intestine; Dysplasia of vocal cord; Dyspnea; History of omphalocele;  
 History of small bowel obstruction; Nontoxic single thyroid nodule  
 Anxiety; Hyperlipidemia  
 Anxiety; Gout; Hypertrophy tonsils; Obesity  
 Attention deficit disorder; Asthma; Chronic depression; Hypersomnia; Nicotine dependence; Obesity  
 Anxiety; Fibroid; Gastroesophageal reflux disease; Hiatal hernia; viral pneumonia; Hypothyroidism

Asthma; Depression; Endometriosis; Hepatitis C; Hypercholesteremia; Migraine; Spondylosis, lumbar region; Intervertebral disc degeneration, lumbar region; Insomnia; Gastroesophageal reflux disease without esophagitis; Acute stress reaction  
Hypothyroidism  
Blindness; Brain cyst; Chronic obstructive pulmonary disease; Gastroesophageal reflux disease; Head trauma in child; Migraines; Seizures  
Thyroid disease; Cerebral vascular accident; Obstructive sleep apnea; Hyperlipidemia; Lung disease; Cervical cancer  
Chronic kidney disease; Gout; Liver fibrosis; Obesity; Obstructive sleep apnea; Thyroid disease; Transient ischemic attack  
Anxiety; Asthma; Thrombophlebitis  
Asthma; Obesity; Obstructive sleep apnea  
Malignant neoplasm of uterus  
Anemia, iron deficiency; Breast cancer; Dysthymic disorder; Gastroesophageal reflux disease; Obstructive sleep apnea; Tracheal stenosis; Vasodepressor syncope; and Vocal cord paralysis; Hyperlipidemia  
Anemia; Anxiety; Migraines; Spastic hemiparesis of left dominant side; Gastroesophageal reflux disease

**Table S4.** Significantly impacted pathways stratified by diagnoses (\*\* FDR  $0.01 < p < 0.05$ , \* FDR  $0.05 < p < 0.10$ , no \* FDR  $> 0.10$ ).

| Significantly Impacted Pathways                |                                              |
|------------------------------------------------|----------------------------------------------|
| <b>Any cardiac dysfunction</b>                 | <b>Arrhythmia</b>                            |
| Arginine biosynthesis *                        | Valine, leucine and isoleucine biosynthesis* |
| Histidine metabolism *                         | Glutathione metabolism*                      |
| Butanoate metabolism *                         | Arginine biosynthesis                        |
| D-Glutamine and D-glutamate metabolism         | Primary bile acid biosynthesis               |
| Glutathione metabolism                         | Aminoacyl-tRNA biosynthesis                  |
| Alanine, aspartate and glutamate metabolism    | Taurine and hypotaurine metabolism           |
| Cysteine and methionine metabolism             | Arginine and proline metabolism              |
| Arginine and proline metabolism                |                                              |
| Aminoacyl-tRNA biosynthesis                    |                                              |
| <b>RV dysfunction</b>                          | <b>Worsened QOL</b>                          |
| Arginine biosynthesis *                        | Aminoacyl-tRNA biosynthesis                  |
| Butanoate metabolism *                         | Biosynthesis of unsaturated fatty acids      |
| Histidine metabolism *                         | Histidine metabolism                         |
| D-Glutamine and D-glutamate metabolism *       | Sphingolipid metabolism                      |
| Glutathione metabolism                         |                                              |
| Alanine, aspartate and glutamate metabolism    |                                              |
| Glycine, serine and threonine metabolism       |                                              |
| Cysteine and methionine metabolism             |                                              |
| Arginine and proline metabolism                |                                              |
| Aminoacyl-tRNA biosynthesis                    |                                              |
| Sphingolipid metabolism                        |                                              |
| <b>Shortness of breath</b>                     |                                              |
| Glycine, serine and threonine metabolism       |                                              |
| Glycerophospholipid metabolism                 |                                              |
| Arginine biosynthesis                          |                                              |
| Histidine metabolism                           |                                              |
| Citrate cycle (TCA cycle)                      |                                              |
| <b>Exertional shortness of breath</b>          |                                              |
| Valine, leucine and isoleucine biosynthesis ** |                                              |
| Butanoate metabolism *                         |                                              |
| D-Glutamine and D-glutamate metabolism         |                                              |

Aminoacyl-tRNA biosynthesis  
 Alanine, aspartate and glutamate metabolism  
 Valine, leucine and isoleucine degradation  
 Citrate cycle (TCA cycle)  
**Low oxygen saturation**  
 Primary bile acid biosynthesis \*\*  
 D-Arginine and D-ornithine metabolism  
 Arginine and proline metabolism  
 Taurine and hypotaurine metabolism  
 Arginine biosynthesis  
 Butanoate metabolism

Abbreviations: FDR—false discovery rate; TCA—tricarboxylic acid cycle.

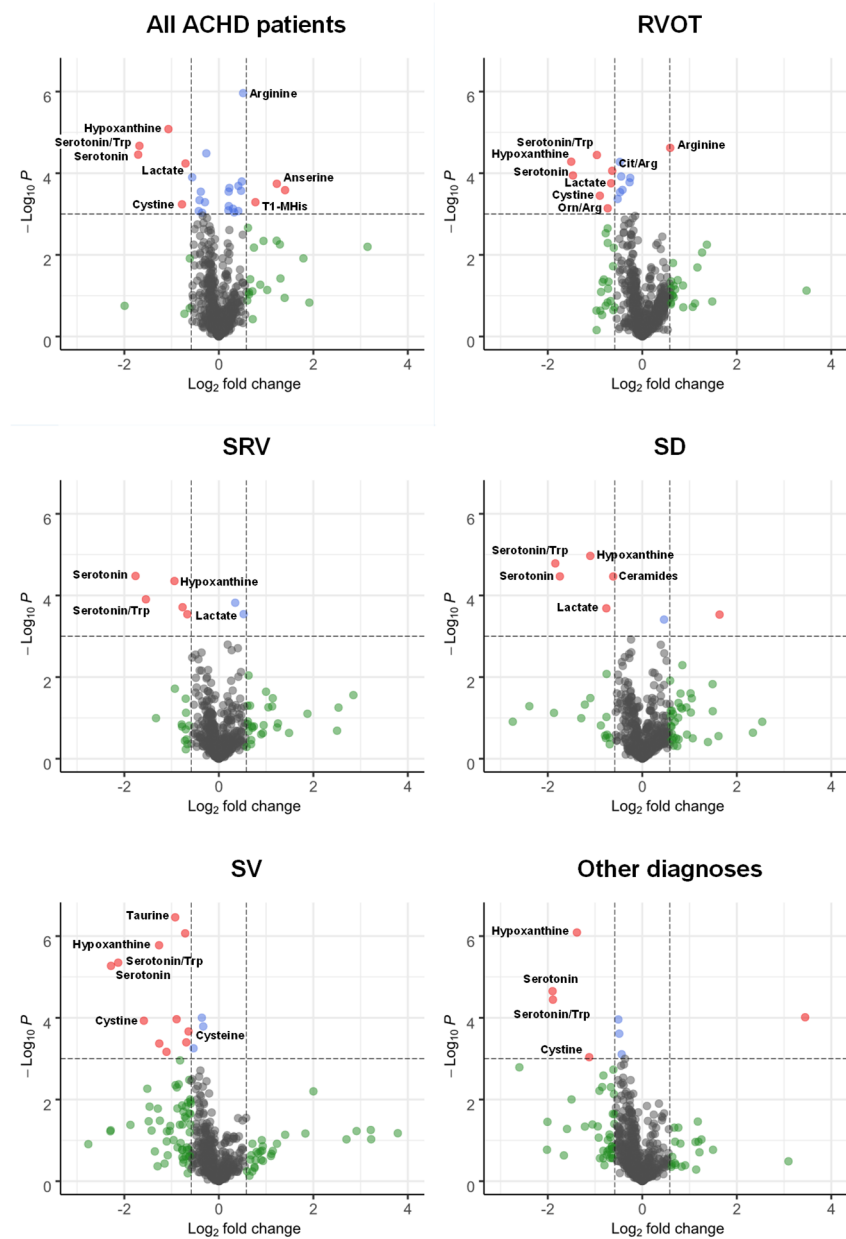

**Figure S1.** Volcano plots for differential expression of metabolites between controls and patients with ACHD, stratified by type of diagnosis (fold difference cutoff: 0.67/1.50,  $p$ -value cutoff: 0.001). Note:

Unlabelled red circles represent generic lipid-derived metabolites. Abbreviations: Arg—arginine; Cit—citrulline; Orn—ornithine; RVOT—right ventricular outflow stenosis; T1-MHis—1-Methylhistidine; TGA—transposition of the great arteries; TOF—Tetralogy of Fallot; Trp—tryptophan.

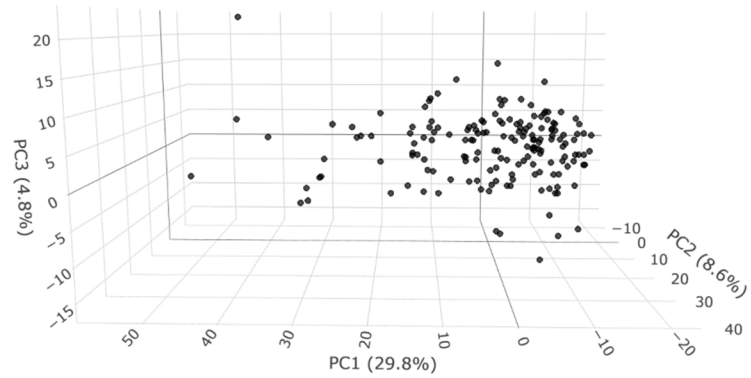

**Figure S2.** Principal cluster analysis plot in 3 dimensions.

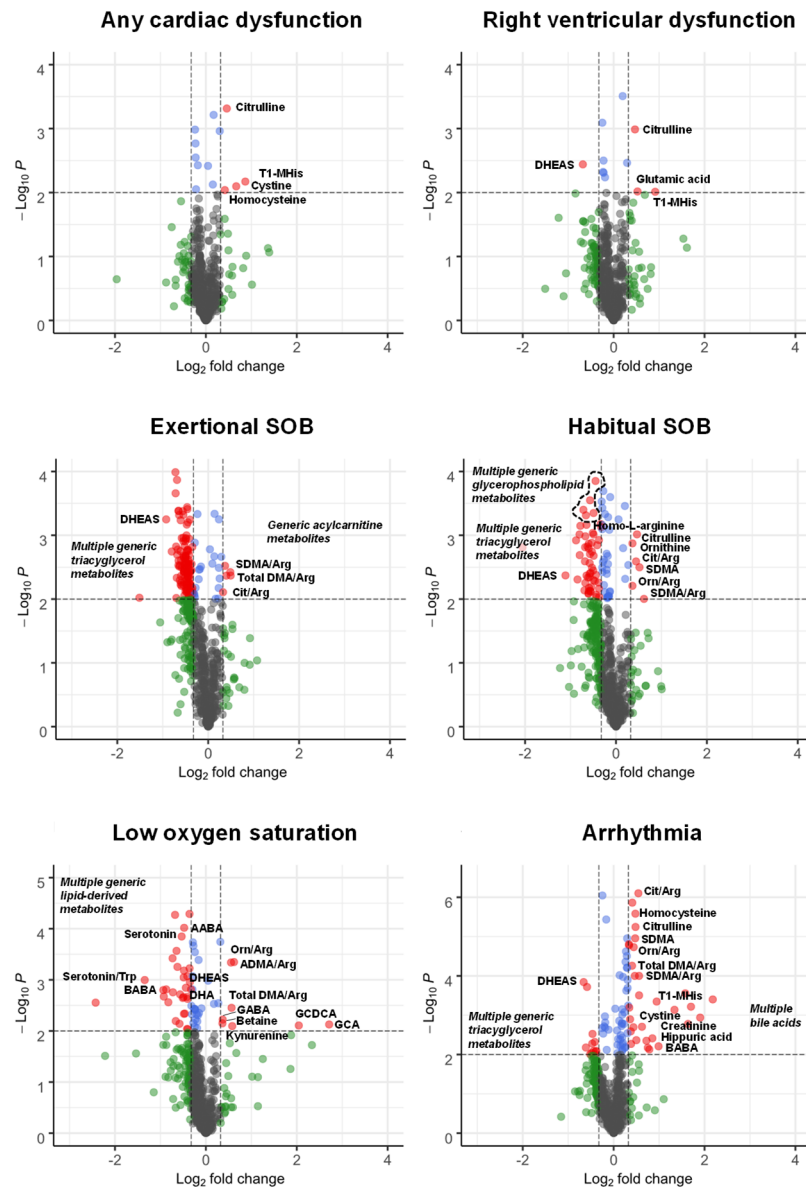

**Figure S3.** Volcano plots for differential expression of metabolites between patients with and without various clinical characteristics and outcomes (fold difference cutoff: 0.80/1.25, *p*-value cutoff: 0.01). Notes: For each graphs/areas, label in *italic* applies to all red circles that are unlabelled. In the habitual SOB panel, metabolites circles in dotted black line represent the generic glycerophospholipids metabolites, all other non-labelled metabolites in this area are generic triaglycerol metabolites. Habitual SOB—SOB not associated with exertion; Arrhythmia—history of arrhythmia. Abbreviations: ADMA— asymmetric dimethylarginine; ABBA—3-aminobutanoic acid; BABA—L- $\alpha$ -aminobutyric acid; Arg—arginine; Cit—citrulline; DHA—dosaheanoic acid; DHEAS—dehydroepiandrosterone sulfate; DMA—dimethylarginine; GABA—gamma aminobutyric acid; GCA—glycocholic acid; GCDCA—chenodeoxycholic acid glycine conjugate; Orn—ornithine; SDMA—symmetric dimethylarginine; SOB—shortness of breath; T1-MHis—1-Methylhistidine; Trp—tryptophan.
